# Supplementary material for: Maternal Ferritin Levels during Pregnancy and ADHD Symptoms in 4-Year-Old Children: Results from the INMA–INfancia y Medio Ambiente (Environment and Childhood) Prospective Birth Cohort Study
Source: PubMed Central journal article supplement (PMC7659477; doi:10.3390/ijerph17217704), 2020-10-22
Supplement: ijerph-17-07704-s001.pdf [file ijerph-17-07704-s001.pdf]

**Table S1. Descriptive characteristics of the study simple and the excluded sample.**

| Variables                                |            | TOTAL<br>N = 1095 |              | EXCLUDED<br>N = 1055 |              | p                |
|------------------------------------------|------------|-------------------|--------------|----------------------|--------------|------------------|
|                                          |            | N (%)             | Mean(SD)     | N (%)                | Mean(SD)     |                  |
| <i>Child characteristics</i>             |            |                   |              |                      |              |                  |
| Sex                                      | Female     | 540 (49.32)       |              | 441 (41.8)           |              | 0,551            |
|                                          | Male       | 555 (50.68)       |              | 480 (45.5)           |              |                  |
|                                          | Missing    | 0 (0)             |              | 134 (12.7)           |              |                  |
| Preterm                                  | No         | 1046 (95.53)      |              | 869 (82.4)           |              | 0,171            |
|                                          | Yes        | 41 (3.74)         |              | 47 (4.45)            |              |                  |
|                                          | Missing    | 8 (0.73)          |              | 139 (13.2)           |              |                  |
| Sibling order                            | Not first  | 478 (43.65)       |              | 553 (52.42)          |              | 0,304            |
|                                          | First      | 617 (56.35)       |              | 472 (44.74)          |              |                  |
|                                          | Missing    | 0 (0)             |              | 30 (2.84)            |              |                  |
| Lives with<br>mother/father              | Both       | 1053 (96.16)      |              | 715 (67.77)          |              | 0,3844           |
|                                          | Only one   | 15 (1.37)         |              | 15 ( 1.42 )          |              |                  |
|                                          | Missing    | 27 (2.47)         |              | 325 (30.81)          |              |                  |
| Number of people<br>who lives with       | Missing    | 27 (2.47)         | 2.57 (0.76)  | 325 (30.81)          | 2.70 (0.98)  | <b>0,004</b>     |
| Breastfeeding                            | Missing    | 14 (1.28)         | 26.6 (19.82) | 283 (26.82)          | 24.9 (20.1)  | 0,065            |
| Hg (µg/l) in umbilical<br>cord           | Missing    | 247 (22.5 )       | 10.77 (8.65) | 357 (33.84)          | 9.79 (8.52)  | <b>0,026</b>     |
| <i>Maternal characteristics</i>          |            |                   |              |                      |              |                  |
| Ferritin level (log<br>scale)            | Missing    | 0 (0)             | 3.32 (0.75)  | 196 (18.58)          | 3.29 (0.75)  |                  |
| Maternal blood<br>collection week        | Missing    | 2 ( 0.18 )        | 11.57 (3.58) | 68 (6.45)            | 12.69 (7.01) | <b>&lt;0.001</b> |
| Alcohol intake during<br>pregnancy       | Missing    | 0 (0)             | 0.33 (0.98)  | 20 (2.75)            | 0.37 (1.19)  | 0,46             |
| Pre-pregnancy BMI                        | Missing    | 0 (0)             | 23.57 (4.29) | 31 (2.94)            | 23.4 (4.36)  | 0,5              |
| Age                                      | Missing    | 1 (0.09)          | 30.92 (3.94) | 0 (0)                | 29.8 (4.74)  | <b>&lt;0.001</b> |
| Mental health (14<br>months after birth) | Missing    | 405 (36.99)       | 9.64 (3.72)  | 730 (69.19)          | 9.95 (4.39)  | 0,249            |
| Parity                                   | Missing    | 2 (0.18)          | 0.51 (0.64)  | 30 (2.84)            | 0.56 (0.71)  | 0,061            |
| Smoking during<br>pregnancy              | No         | 912 (83.29)       |              | 730 (69.2)           |              | 0,082            |
|                                          | Yes        | 167 (15.25)       |              | 166 (15.7)           |              |                  |
|                                          | Missing    | 16 (1.46)         |              | 159 (15.1)           |              |                  |
| Country of birth                         | Spain      | 1025 (93.61)      |              | 795 (75.36)          |              | <b>&lt;0.001</b> |
|                                          | Other      | 68 (6.21)         |              | 117 (11.1)           |              |                  |
|                                          | Missing    | 2 (0.18)          |              | 143 (13.6)           |              |                  |
| Social class                             | Non manual | 594 (54.25)       |              | 379 (35.9)           |              | <b>&lt;0.001</b> |
|                                          | Manual     | 501 (45.75)       |              | 539 (51.1)           |              |                  |
|                                          | Missing    | 0 (0)             |              | 137 (13.0)           |              |                  |
| Education level                          | Primary    | 228 ( 20.82 )     |              | 335 (31.8)           |              | <b>&lt;0.001</b> |
|                                          | Secondary  | 461 ( 42.1 )      |              | 401 (38.0)           |              |                  |
|                                          | University | 402 ( 36.71 )     |              | 289 (27.4)           |              |                  |
|                                          | Missing    | 4 ( 0.37 )        |              | 30 (2.84)            |              |                  |

\* One-way ANOVA for mean differences and Chi squared test for categorical variables.
